# Supplementary material for: Associations between moderate alcohol consumption, brain iron, and cognition in UK Biobank participants: Observational and mendelian randomization analyses
Source: PLoS Med. 2022 Jul 14;19(7):e1004039. doi: 10.1371/journal.pmed.1004039 (PMC9282660; doi:10.1371/journal.pmed.1004039)
Supplement: S8 Table — (XLSX) [file pmed.1004039.s018.xlsx]

## Sheet: Sheet1
STable 8: Observational associations between weekly alcohol intake (quintiles) and brain susceptibility, additionally adjusted for diet and iron supplementation
Brain region	Alcohol weekly	N	Estimate	LCI	UCI	p value
Left putamen	Never drinkers	156	-0.07575	-0.235416	0.0839258	0.352431
	Previous drinkers	155	0.1207	-0.038111	0.279592	0.136268
	<7 units	1448	Ref	Ref	Ref	Ref
	7 - <12 units	1126	0.003638	-0.0705535	0.0778289	0.92343
	12 - <18 units	1271	0.06975	-0.00287133	0.142378	0.059769
	18 - <29 units	1210	0.09644	0.0218134	0.171073	0.011323
	29+ units	1150	0.2481	0.169154	0.3271	7.76e-10
Right putamen	Never drinkers	156	-0.09541	-0.255052	0.0642399	0.241435
	Previous drinkers	155	0.07502	-0.0838083	0.233845	0.35452
	<7 units	1448	Ref	Ref	Ref	Ref
	7 - <12 units	1126	-0.00716	-0.0813341	0.0670251	0.850043
	12 - <18 units	1271	0.0403	-0.0323504	0.112876	0.277089
	18 - <29 units	1210	0.07176	-0.00286076	0.146376	0.059451
	29+ units	1150	0.2089	0.129962	0.287883	2.2e-07
Left caudate	Never drinkers	156	-0.02487	-0.191072	0.141329	0.769259
	Previous drinkers	155	0.1073	-0.0580132	0.272682	0.203228
	<7 units	1448	Ref	Ref	Ref	Ref
	7 - <12 units	1126	0.0257	-0.0515237	0.102926	0.514153
	12 - <18 units	1271	0.0489	-0.0266906	0.124498	0.204777
	18 - <29 units	1210	0.09193	0.0142485	0.169612	0.020378
	29+ units	1150	0.1143	0.0320998	0.196504	0.006431
Right caudate	Never drinkers	156	-0.03596	-0.201729	0.129802	0.670633
	Previous drinkers	155	0.07788	-0.0870364	0.242793	0.354617
	<7 units	1448	Ref	Ref	Ref	Ref
	7 - <12 units	1126	0.04167	-0.0353569	0.118689	0.288977
	12 - <18 units	1271	0.09723	0.0218313	0.172625	0.011497
	18 - <29 units	1210	0.1075	0.0300492	0.185006	0.006533
	29+ units	1150	0.1321	0.050139	0.214113	0.00159
Left hippocampus	Never drinkers	156	0.05878	-0.106254	0.223817	0.485063
	Previous drinkers	155	0.2251	0.0609199	0.389297	0.007213
	<7 units	1448	Ref	Ref	Ref	Ref
	7 - <12 units	1126	0.04364	-0.0330486	0.120319	0.264685
	12 - <18 units	1271	0.06069	-0.0143729	0.135756	0.11302
	18 - <29 units	1210	0.07282	-0.00431854	0.149956	0.064275
	29+ units	1150	0.09238	0.0107589	0.174011	0.026541
Right hippocampus	Never drinkers	156	0.04898	-0.115658	0.21362	0.559774
	Previous drinkers	155	0.219	0.0552548	0.382843	0.008772
	<7 units	1448	Ref	Ref	Ref	Ref
	7 - <12 units	1126	0.04586	-0.0306411	0.122358	0.239981
	12 - <18 units	1271	0.06381	-0.0110727	0.138696	0.094875
	18 - <29 units	1210	0.09473	0.0177765	0.17168	0.015842
	29+ units	1150	0.09464	0.0132068	0.176067	0.022743
Left amygdala	Never drinkers	156	0.02962	-0.139793	0.199039	0.731779
	Previous drinkers	155	0.05139	-0.117152	0.219941	0.55002
	<7 units	1448	Ref	Ref	Ref	Ref
	7 - <12 units	1126	0.006049	-0.0726701	0.0847684	0.880263
	12 - <18 units	1271	0.06791	-0.00914772	0.144966	0.084105
	18 - <29 units	1210	0.03542	-0.0437652	0.114604	0.380593
	29+ units	1150	0.07291	-0.01088	0.1567	0.088102
Right amygdala	Never drinkers	156	-0.02667	-0.197162	0.143814	0.75907
	Previous drinkers	155	0.08652	-0.167346	0.17188	0.9791
	<7 units	1448	Ref	Ref	Ref	Ref
	7 - <12 units	1126	0.04041	-0.0903833	0.0680509	0.78231
	12 - <18 units	1271	0.05125	-0.0262967	0.128792	0.19518
	18 - <29 units	1210	0.03763	-0.0420573	0.117314	0.35464
	29+ units	1150	0.06468	-0.0196466	0.148999	0.13274
Left pallidum	Never drinkers	156	0.1278	-0.0398182	0.295335	0.135085
	Previous drinkers	155	0.2689	0.102189	0.435623	0.001575
	<7 units	1448	Ref	Ref	Ref	Ref
	7 - <12 units	1126	0.07278	-0.00508406	0.150645	0.066948
	12 - <18 units	1271	0.09604	0.0198159	0.172257	0.013538
	18 - <29 units	1210	0.0835	0.00517145	0.161822	0.036678
	29+ units	1150	-0.003511	-0.086394	0.0793721	0.933822
Right pallidum	Never drinkers	156	0.1676	2.96069e-05	0.335177	0.04996
	Previous drinkers	155	0.1511	2.96069e-05	0.335177	0.075601
	<7 units	1448	Ref	Ref	Ref	Ref
	7 - <12 units	1126	0.05827	-0.0195884	0.136138	0.14238
	12 - <18 units	1271	0.08207	0.00585266	0.158291	0.034823
	18 - <29 units	1210	0.1102	0.0318579	0.188505	0.005838
	29+ units	1150	0.007155	-0.0757264	0.0900369	0.865615
Left accumbens	Never drinkers	156	-0.1025	-0.272181	0.0672192	0.23652
	Previous drinkers	155	-0.08649	-0.255317	0.0823413	0.3153
	<7 units	1448	Ref	Ref	Ref	Ref
	7 - <12 units	1126	-0.05957	-0.272181	0.0672192	0.13866
	12 - <18 units	1271	-0.06224	-0.255317	0.0823413	0.11396
	18 - <29 units	1210	-0.07994	-0.139431	0.014942	0.04823
	29+ units	1150	-0.08213	-0.159258	-0.000622438	0.04823
Right accumbens	Never drinkers	156	-0.1469	-0.317545	0.0237248	0.0915
	Previous drinkers	155	0.0533	-0.116459	0.22306	0.5382
	<7 units	1448	Ref	Ref	Ref	Ref
	7 - <12 units	1126	-0.02326	-0.102547	0.0560247	0.5652
	12 - <18 units	1271	-0.02266	-0.10027	0.0549526	0.5671
	18 - <29 units	1210	-0.07582	-0.155574	0.00393539	0.0624
	29+ units	1150	-0.01811	-0.102501	0.0662904	0.6741
Left substantia nigra	Never drinkers	156	-0.03577	-0.203963	0.132424	0.676763
	Previous drinkers	155	0.1351	-0.0322511	0.30241	0.113584
	<7 units	1448	Ref	Ref	Ref	Ref
	7 - <12 units	1126	0.04264	-0.0355108	0.120792	0.284845
	12 - <18 units	1271	0.08015	0.00364607	0.156648	0.040039
	18 - <29 units	1210	0.08563	0.00701991	0.164247	0.032767
	29+ units	1150	0.1255	0.0423515	0.208728	0.003104
Right substantia nigra	Never drinkers	156	-0.04677	-0.21475	0.121203	0.58518
	Previous drinkers	155	0.08094	-0.0861795	0.24805	0.58518
	<7 units	1448	Ref	Ref	Ref	Ref
	7 - <12 units	1126	0.03659	-0.0414608	0.11464	0.58518
	12 - <18 units	1271	0.04754	-0.0288612	0.123944	0.58518
	18 - <29 units	1210	0.04754	0.00350338	0.160527	0.58518
	29+ units	1150	0.07696	-0.00612459	0.160037	0.58518
Estimates are given for adjusted associations (for age, sex, smoking, body mass index, educational qualifications, Townsend Deprivation Index, household income, historical job code, diabetes, cholesterol, blood pressure, rs1800562, rs1799945 and rs855791 and full set of image-related confounds), diet and iron supplementation
Reference group (ref) is participants drinking <7 units alcohol weekly
N=6516 subjects with complete data on diet and iron supplementation
Abbreviations: LCI - lower confidence interval, UCI - upper confidence interval, Ref - reference group
